# Supplementary material for: Non–SCF-type F-box protein Roy1/Ymr258c interacts with a Rab5-like GTPase Ypt52 and inhibits Ypt52 function
Source: PubMed Central journal article supplement — Mol Biol Cell. 2011 May 1;22(9):1575–84. doi: 10.1091/mbc.E10-08-0716 (PMC3084679; doi:10.1091/mbc.e10-08-0716), 2011-05-01
Supplement: E10-08-0716_1.pdf [file E10-08-0716_1.pdf]

### **Supplemental Figure legend**

**Figure S1.** Roy1-5FLAG was functionally active concerning temperature-sensitive growth and CPY sorting. (A) The indicated yeast cells were grown to exponential phase in YPD medium. Cells were harvested and resuspended in YPD medium. 3  $\mu$ l of 10-fold serial dilutions was spotted onto YPD plates, incubated for 36 hours at the indicated temperature, and photographed. (B) The indicated yeast cells were harvested and lysed by the TCA lysis method. Extracts were subjected to IB with indicated antibodies.

**A**

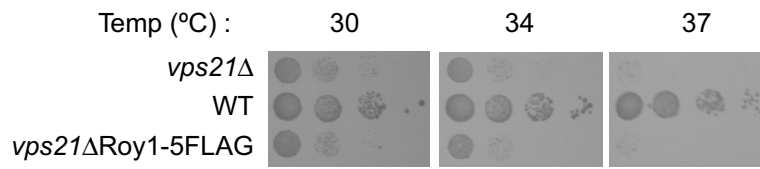

**B**

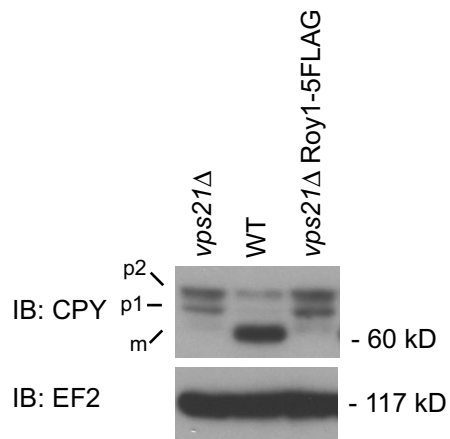

**Liu\_Figure S1**

**Supplemental Table S1. Yeast strains used in this study**

| Strains | Relevant genotype                                                                      | Source     |
|---------|----------------------------------------------------------------------------------------|------------|
| L40     | <i>MATa, LYS2::lexA-HIS3, URA3::lexA-lacZ, trp1, leu2, his3</i>                        | Invitrogen |
| W303-1A | <i>MATa, can1-100, leu2-3,-112, his3- 11,-15, trp1-1, ura3-1, ade2-1</i>               | Y. Kikuchi |
| MTY1849 | W303-1A, <i>MATa, skp1-11</i>                                                          | M. Tyers   |
| TK601   | W303-1A, <i>MATa, pdr5::HPH, ROY1-(5FLAG)::KAN</i>                                     | This study |
| TK1268  | W303-1A, <i>MATa, pdr5::HPH, roy1::KAN</i>                                             | This study |
| TK1269  | W303-1A, <i>MATa, pdr5::HPH, ypt52::HIS3</i>                                           | This study |
| TK1270  | W303-1A, <i>MATa, pdr5::HPH, vps21::TRP1</i>                                           | This study |
| TK1271  | W303-1A, <i>MATa, pdr5::HPH, roy1::KAN, ypt52::HIS3</i>                                | This study |
| TK1272  | W303-1A, <i>MATa, pdr5::HPH, roy1::KAN, vps21::TRP1</i>                                | This study |
| TK1273  | W303-1A, <i>MATa, pdr5::HPH, ypt52::HIS3, vps21::TRP1</i>                              | This study |
| TK1274  | W303-1A, <i>MATa, pdr5::HPH, roy1::KAN, ypt52::HIS3, vps21::TRP1</i>                   | This study |
| TK1288  | W303-1A, <i>MATa, pdr5::HPH, vps21::TRP1, URA3::YPT52</i>                              | This study |
| TK1289  | W303-1A, <i>MATa, pdr5::HPH, vps21::TRP1, URA3::YPT52-YPT52</i>                        | This study |
| TK1393  | W303-1A, <i>MATa, pdr5::HPH, roy1::KAN, vps21::TRP1, vps9::LEU2</i>                    | This study |
| TK1396  | W303-1A, <i>MATa, pdr5::HPH, VPS9-(3HA)::LEU2</i>                                      | This study |
| TK1397  | W303-1A, <i>MATa, pdr5::HPH, roy1::KAN, URA3::GAL1</i>                                 | This study |
| TK1398  | W303-1A, <i>MATa, pdr5::HPH, roy1::KAN, URA3::GAL1-ROY1-(5FLAG)</i>                    | This study |
| TK1399  | W303-1A, <i>MATa, pdr5::HPH, roy1::KAN, URA3::GAL1-ROY1 1-452 (a.a.) -(5FLAG)</i>      | This study |
| TK1400  | W303-1A, <i>MATa, pdr5::HPH, roy1::KAN, URA3::GAL1-ROY1 1-352 (a.a.) -(5FLAG)</i>      | This study |
| TK1401  | W303-1A, <i>MATa, pdr5::HPH, roy1::KAN, URA3::GAL1-ROY1 1-252 (a.a.) -(5FLAG)</i>      | This study |
| TK1402  | W303-1A, <i>MATa, pdr5::HPH, roy1::KAN, URA3::GAL1-ROY1 43-554 (a.a.) -(5FLAG)</i>     | This study |
| TK1403  | W303-1A, <i>MATa, skp1-11, ROY1-(5FLAG)::KAN</i>                                       | This study |
| TK1404  | W303-1A, <i>MATa, pdr5::HPH, ypt52::HIS3, ROY1-(5FLAG)::KAN</i>                        | This study |
| TK1405  | W303-1A, <i>MATa, pdr5::HPH, UFO1-(5FLAG)::KAN</i>                                     | This study |
| TK1406  | W303-1A, <i>MATa, pdr5::HPH, roy1::KAN, vps21::TRP1, URA3::GAL1</i>                    | This study |
| TK1407  | W303-1A, <i>MATa, pdr5::HPH, roy1::KAN, vps21::TRP1, URA3::GAL1-ROY1</i>               | This study |
| TK1411  | W303-1A, <i>MATa, pdr5::HPH, roy1::KAN, vps21::TRP1, URA3::GAL1-ROY1 43-554 (a.a.)</i> | This study |
| TK1455  | W303-1A, <i>MATa, pdr5::HPH, pep12::LEU2</i>                                           | This study |
| TK1457  | W303-1A, <i>MATa, pdr5::HPH, roy1::KAN, pep12::LEU2</i>                                | This study |
